# Supplementary material for: Production and use of antigen tetramers to study antigen-specific B cells
Source: Springer Nature journal article supplement (doi:10.1038/s41596-023-00930-8), 2024-01-19
Supplement: MOESM3 [file 41596_2023_930_MOESM3_ESM11.xlsx]

## Sheet: NEW TETRAMER SHEET
Calculation Worksheet for Tetramer Construction; Phelps, Pazos-Castero et al. 2023, Nature Protocols.
	Legend	Name
	Values to Enter	Date
	Values to Use	Experiment ID
	Extra Information
	Good
	Bad
	I. BIOTINYLATION OF PROTEIN
1	Product Information
	Protein:
	Company and Product Code:
	Lot Number:
	Purity:
	Molecular Weight (kDa):
	Molar Extinction Coefficient (M-1 cm-1) or E1%:
2	Diluting Protein
	Desired Molar Concentration (µM):
	Protein in Appropriate [c] Range?	NO	Yes = desired molar [c] (μM) >5μM and <500μM
	Expected Concentration (mg/mL):	0	=desired molar [c] (μM) x MW (kDa) ÷ 1000
	Calculation based on amount of protein
	Amount of Protein Used (mg):
	Volume of PBS to Add (mL):	#DIV/0!	=amount of protein (mg) ÷ expected [c] (mg/mL)
	Calculation based on using all available biotin
	Amount of 10mM biotin to use (μL):		Use less than the maximum available
	Amount of 10mM biotin (nmol):	0	=amount of 10mM biotin (μL) x 10
	Biotinylation Ratio (1 biotin : X protein):		Usual ratio is 1.3
	Amount of Protein Needed (nmol):	0	=10mM biotin (nmol) x protein in biotinylation ratio
	Amount of Protein to Use (mg):	0	= protein needed (nmol) x 1.25 x MW (kDa) ÷ 1000 Make more than needed. Change green number to adjust
	Volume of PBS to Use (mL):	#DIV/0!	=amount of protein (mg) ÷ expected [c] (mg/mL)
3	True Concentration Calculation
	Concentration from Nanodrop (mg/mL):		Use molar extinction coefficient (M-1 cm-1) or E1%
	A280:
	A260/A280:
	True Protein Concentration (µM):	#DIV/0!	=protein [c] (mg/mL) x 1000 ÷ MW (kDa)
	Difference from Desired Concentration:	#DIV/0!	=true protein [c] (μM) – desired protein [c] (μM)
	Protein in Appropriate [c] Range?	#DIV/0!	Yes = desired molar [c] (μM) >5μM and <500μM
4	Calculating Biotin to Add
	Volume of Protein to Biotinylate (mL):
	Biotinylation Ratio (1 biotin : X protein):		Usual ratio is 1.3
	Moles of Protein to Biotinylate (nmol):	#DIV/0!	=true protein [c] (μM) x protein to biotinylate (mL)
	Moles of Biotin to Add (nmol):	#DIV/0!	=protein to biotinylate (nmol) ÷ protein in biotinylation ratio
	Volume of 10 mM Biotin to Add (µL):	#DIV/0!	=nmoles of biotin to add ÷ 10
	Calculation based on using all available biotin
	Amount of 10mM biotin to use (μL):	0	Use less than the maximum available
	Amount of Protein to Add (mL):	#DIV/0!	= protein needed (nmol) ÷ true protein [c] (µM)
5	Remove Free Biotin and Wash Protein
	Minimum Filter Size to Use:	0	=MW(kDa) ÷ 3 (should be 3x smaller than MW(kDa))
	Sping Column Filter Cutoff Used:
	Spin Column Company and Tube Size:
6	Determine Protein Concentration
	Concentration of protein (mg/ml):		Measure right before making 2uM aliquot.
	A280:
	A260/A280:
	Yield Volume (µL):
	Biotinylated Protein Concentration (µM):	#DIV/0!	=Biotinylated protein [c] (mg/mL) x 1000 ÷ MW (kDa)
	Yield Moles of Biotinylated Protein (nmol):	#DIV/0!	=Biotinylated protein [c] (μM) x yield volume (μL) ÷ 1000
	Percent Yield (%):	#DIV/0!	=yield (nmol) ÷ moles to biotinylate(nmol) x 100
	Pause point: Biotinylated proteins typically have the longest half-life when stored at -80°C, but can differ from protein-to-protein
	II. ASSESSING THE BIOTINYLATED PROTEIN
1	Prepare 40µl of protein at 2µM
	Biotinylated Protein Concentration (µM):	#DIV/0!	=calculated above
	Making for How Many Gels?
	Volume of Protein Required (µL):	#DIV/0!	=2 x 40 ÷ biotinylated protien [c] (μM) x num of gels
	Volume of PBS to Add (µL):	#DIV/0!	=40μL – volume of protein req (μL)
	Dilution Factor:	#DIV/0!	=biotinylated protein [c](µM) ÷ 2
2	Prepare 30µl of 1 µM SA-PE
	SA Concentration of SA-PE (mg/ml):		On vial
	SA-PE Lot Number:		On vial
	Molar [c] of SA (µM):		Search lot number on website
	Volume of SA-Required (µL):	#DIV/0!	=30µL ÷ SA molar [c] (µM)
	Volume of PBS to add (µL):	#DIV/0!	=30µL – volume SA added (µL)
3	Calculate Concentration of Biotinylated Protein
	[c] of SA Where Band Reappears (µM):
	Biotin [c] of protein (μM):	#DIV/0!	=[c] of SA where band appears (µM) x 4 x dilution factor
	[c] of Protein (µM):	#DIV/0!	=biotinylated protein [c] (µM), calculated above
	Biotin:Protein Ratio:	#DIV/0!	0.25-0.75 is optimal
	III-A. TETRAMERIZE THE PROTEIN
1	Product Information
	PE or APC?
	Company and Product Code:
	Lot Number:
	OD		OD566 for PE or OD650 for APC
	Molar Extinction Coefficient (M-1 cm-1):		1.96 for PE or 0.7 for APC
1	Calculate Amount of Biotinylated Protein
	SA [c] of SA-PE or SA-APC (µM):		On vial
	Amount of SA-PE or SA-APC to Use (µL):		Depends on amount of tetramer needed. (100μL is a good start)
	Biotin Needed to Saturate SA (pmoles):	0	= SA [c] (µM) x amount of SA used (μL) x 4
	Amount of Protein to Add (µL):	#DIV/0!	= biotin needed (pmoles) ÷ biotin [c] of protein (μM)
2	Concentration of Tetramer After Spin
	Sping Column Filter Cutoff Used:		If protein is under 100kDa, use 100kDa Amicon Ultra spin filter
	Nanodrop Absorbance:		Use Custom -> UVIS on Nanodrop, A566 for PE or A650 for APC
	Molar Extinction Coefficient of PE or APC (M-1 cm-1):		1.96 for PE or 0.7 for APC
	Concentration of PE or APC (µM):	#DIV/0!	= nanodrop absorbance ÷ molar extinction coefficient
3	Dilute the Concentration of PE or APC to 2µM
	Volume of Tetramer to Use (µL):
	Volume of PBS to add (µL):	#DIV/0!	= [tetramer (μL) x PE/APC [c] (μM) ÷ 2μM] – tetramer (μL)
4	Stabilize with Glycerol, PE or APC [c] to 1uM
	Glycerol to Add (µL):	#DIV/0!	= total volume of tetramer at 2μM
	Volume of Tetramer Recovered (µL):	#DIV/0!	= glycerol added (µL) x 2
	III-B. TETRAMERIZE THE PROTEIN - DECOY
1	Product Information
	PE or APC?
	Company and Product Code:
	Lot Number:
	OD		OD566 for PE or OD650 for APC
	Molar Extinction Coefficient (M-1 cm-1):		1.96 for PE or 0.7 for APC
	Dylight NHS Ester Labeling Kit
	Company and Product Code:
	Lot Number:
	OD
	Molar Extinction Coefficient (M-1 cm-1):
2	Calculate PE or APC [c] in DYLIGHT SA-PE/APC		Use Custom -> UVIS on Nanodrop
	PE or APC OD measurement
	Dylight OD measurement
	Concentration of PE or APC (µM):	#DIV/0!	=OD of PE/APC ÷ Molar Ext. Coefficient of PE/APC
	Concentration of DLXXX (µM):	#DIV/0!	=OD of DYXXX ÷ Molar Ext. Coefficient of DYXXX
3	Calculate Amount of Biotinylated Protein
	Amount of SA-PE or SA-APC-DYXXX to Use (µL):		Depends on how much acquired after filtering
	Biotin Needed to Saturate SA (pmoles):	#DIV/0!	= SA-PE/APC-DYXXX used (μL) x [c] of PE/APC (µM) x 6
	Amount of Protein to Add (µL):	#DIV/0!	= biotin needed (pmoles) ÷ biotin [c] of protein (μM)
4	Dilute the Concentration of PE or APC to 2µM
	PE or APC OD measurement		Use Custom -> UVIS on Nanodrop, A566 for PE or A650 for APC
	Concentration of PE or APC (µM):	#DIV/0!	=OD of PE/APC ÷ Molar Ext. Coefficient of PE/APC
	Volume of Tetramer to Use (µL):
	Volume of PBS to add (µL):	#DIV/0!	= [tetramer (μL) x PE/APC [c] (μM) ÷ 2μM] – tetramer (μL)
5	Stabilize with Glycerol, PE or APC [c] to 1uM
	Glycerol to Add (µL):	#DIV/0!	= total volume of tetramer at 2μM
	Volume of Tetramer Recovered (µL):	#DIV/0!	= glycerol added (µL) x 2
